# Supplementary material for: Prevalence, characteristics, and psychological outcomes of workplace cyberbullying during the COVID-19 pandemic in Japan: a cross-sectional online survey
Source: BMC Public Health. 2022 May 31;22:1087. doi: 10.1186/s12889-022-13481-6 (PMC9154040; doi:10.1186/s12889-022-13481-6)
Supplement: Supplementary file 1 — Additional file 1. Categorization of the variables. [file 12889_2022_13481_MOESM1_ESM.xlsx]

## Sheet: Appendix
	Appendix. Categorization of the variables
	Variable	Category	Answer options
	Marital status	Not married	Single, divorced, widowed
		Married	Married, common-law marriage
	Annual household income (JPY)	4 million or less	2 million or less and 2–4 million
		4–8 million	4–6 million and 6–8 million
		8–12 million	8–10 million and 10–12 million
		12 million or more	12–14 million and 14 million or more
	Educational attainment	High school	Elementary school/junior high school, high school
		College etc.	Same to the left
		University/graduate school	Same to the left
	Residential area	Hokkaido/Tohoku	Hokkaido, Aomori, Iwate, Miyagi, Akita, Yamagata, and Fukushima
		Tokyo	Same to the left
		Kanto (excluding Tokyo)	Ibaraki, Tochigi, Gunma, Saitama, Chiba, and Kanagawa
		Chubu	Niigata, Toyama, Ishikawa, Fukui, Yamanashi, Nagano, Gifu, Shizuoka, and Aichi
		Kansai	Mie, Shiga, Kyoto, Osaka, Hyogo, Nara, and Wakayama
		Chugoku/Shikoku	Tottori, Shimane, Okayama, Hiroshima, Yamaguchi, Tokushima, Kagawa, Ehime, and Kochi
		Kyusyu/Okinawa	Fukuoka, Saga, Nagasaki, Kumamoto, Oita, Miyazaki, Kagoshima, and Okinawa
	Type of industry	Construction	Same to the left
		Manufacturing	Same to the left
		Information/communication	Same to the left
		Transportation	Same to the left
		Wholesale/retail trade	Same to the left
		Financing/insurance/real estate	Same to the left
		Healthcare/welfare	Same to the left
		Services	Same to the left
		Public sector	Same to the left
		Academic research	Same to the left
		Others	Electricity, Gas, Water, Heat supply and Agriculture, Forestry, Fisheries, Mining, Quarrying, and others
	Type of work	Professional/technical position	Same to the left
		Clerical position	Same to the left
		Sales position	Same to the left
		Service position	Same to the left
		Production engineering	Same to the left
		Others	Security workers, Agriculture and forestry workers, Transport and machine operation workers, Construction and mining workers, and Carrying, cleaning and related workers, and others
	Position	Non-manager	Same to the left
		Manager	Same to the left
	Number of employees in the workplace	5 or fewer	1 and 2–5
		6–9	Same to the left
		10–19	Same to the left
		20–29	Same to the left
		30 or more	Same to the left
	Average working hours per week	30 or fewer	Same to the left
		30–39	Same to the left
		40–49	Same to the left
		50–59	Same to the left
		60 or more	Same to the left
	Active dissemination via SNSs, blog, or video-sharing site	Yes	Respondents who answered “I actively send out information myself” for at least one of the three internet media.
		No	“I do not use the media at all”, “I rarely use the media”, “I rarely send out information and only read the information sent out by others”, and “I read the information sent out by others more often than I send out information myself”
